# Supplementary material for: Immunothrombotic Mechanisms Induced by Ingenol Mebutate Lead to Rapid Necrosis and Clearance of Anogenital Warts
Source: MDPI journal article supplement (doi:10.3390/ijms232113377), 2022-11-02
Supplement: s1 [file s1]

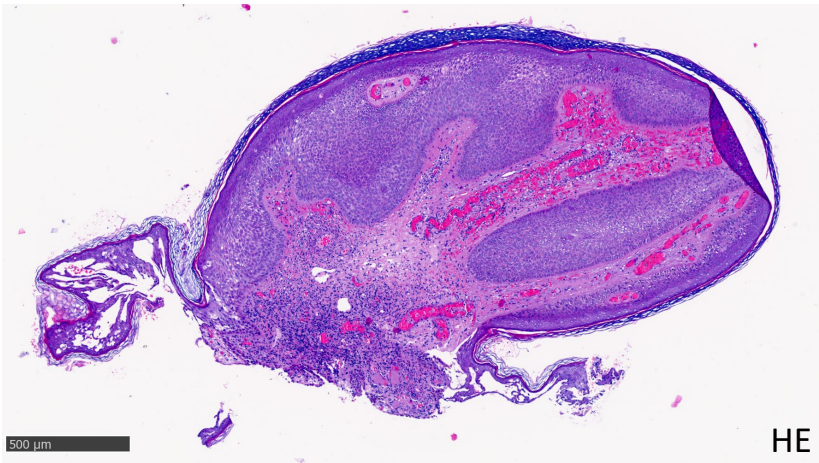

HE

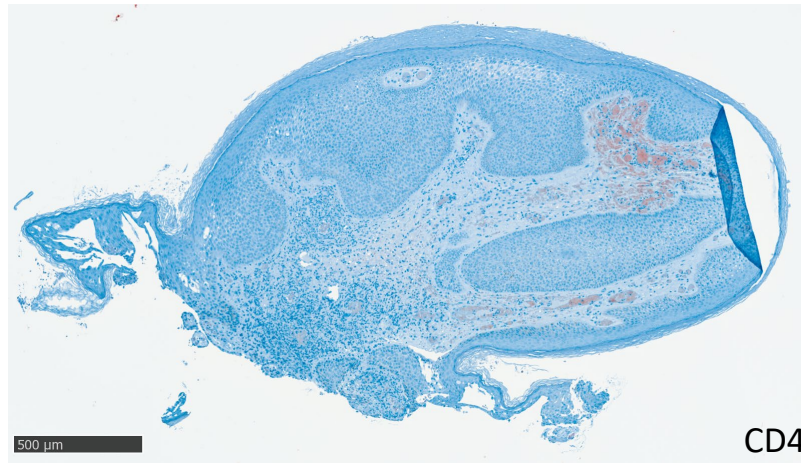

CD4

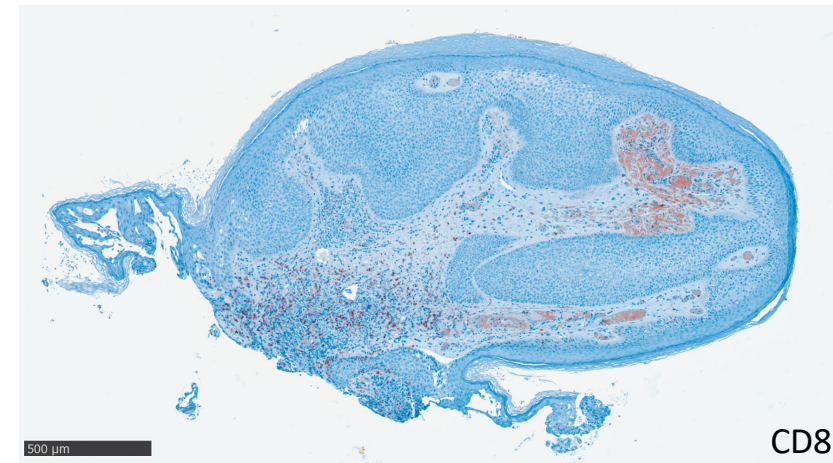

CD8

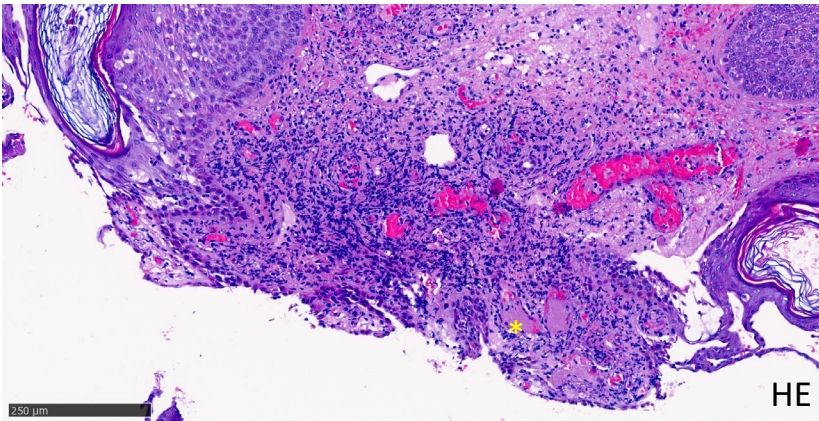

HE

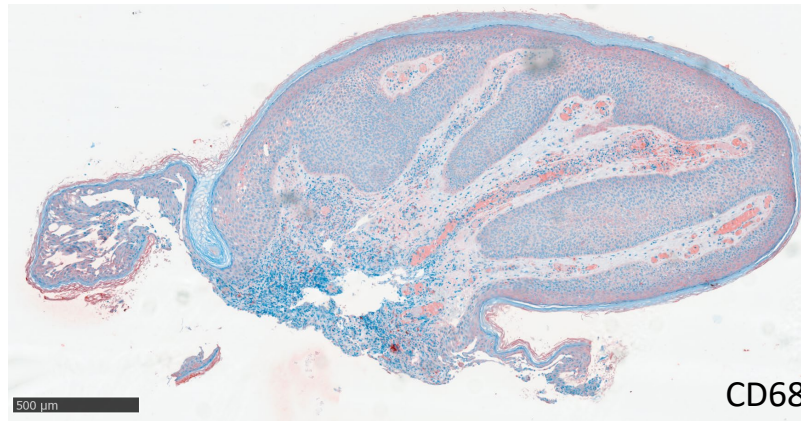

CD68

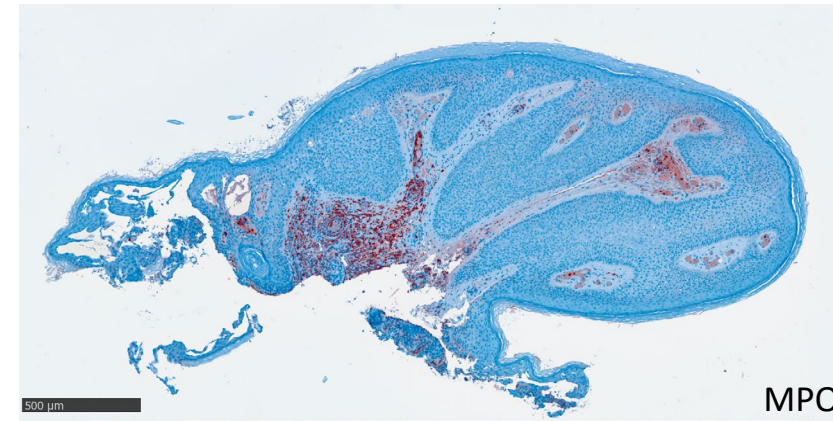

MPO

**Figure S1: Histology of patient 3 after 8 hours.** The HE stains showed fibrinoid thrombi in small vessels (yellow star). Immunohistochemically the inflammatory infiltrate was mixed with dominance of neutrophils.



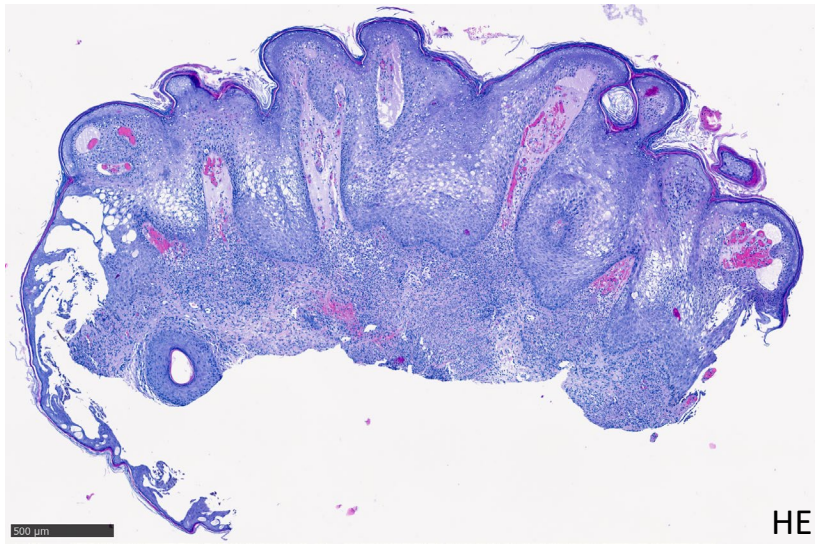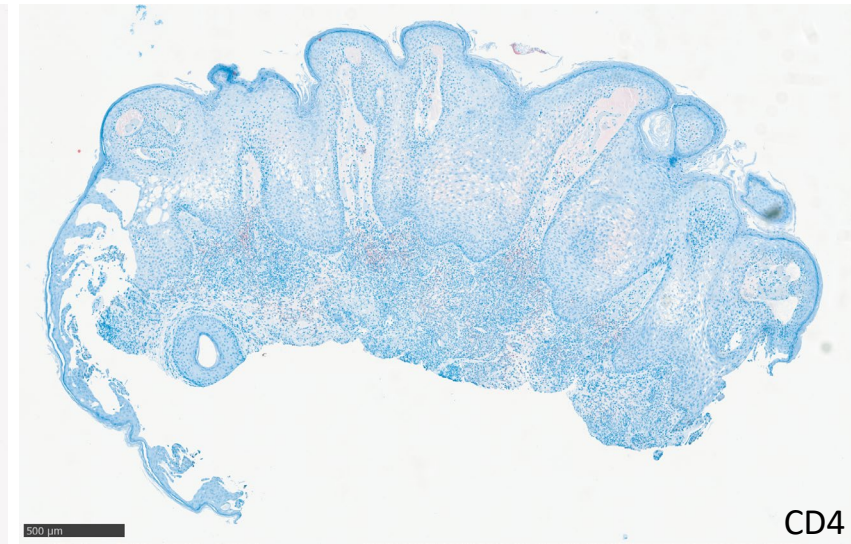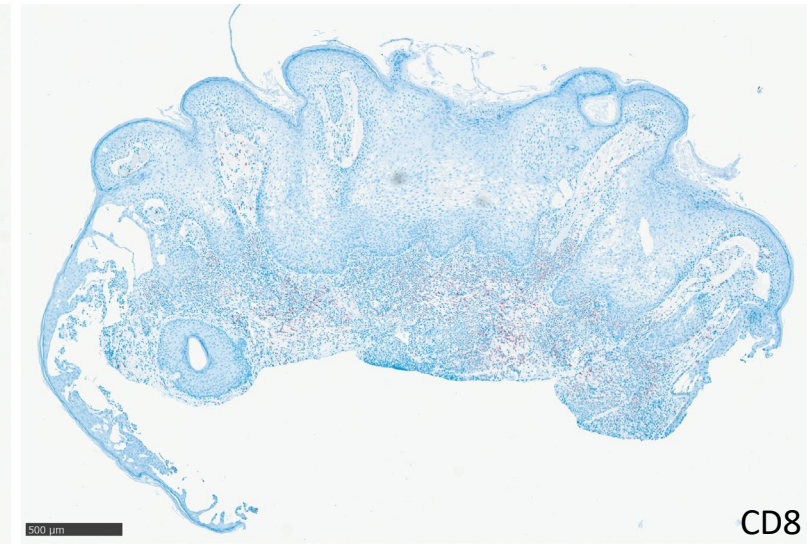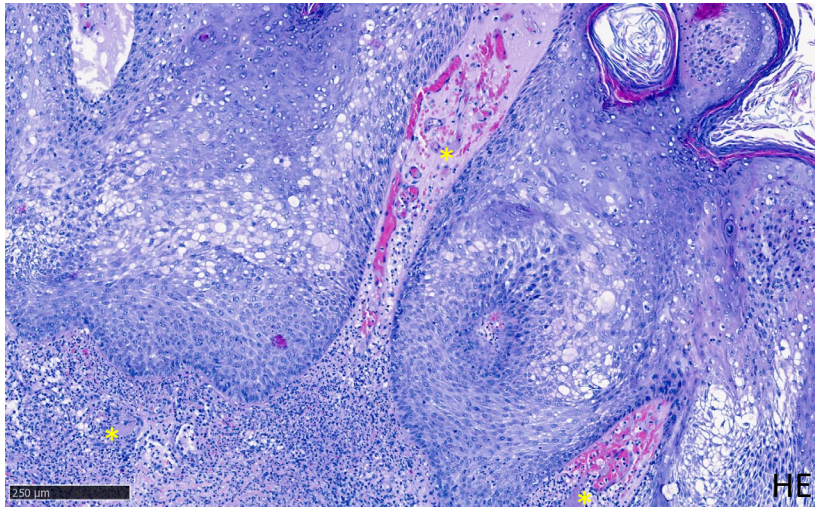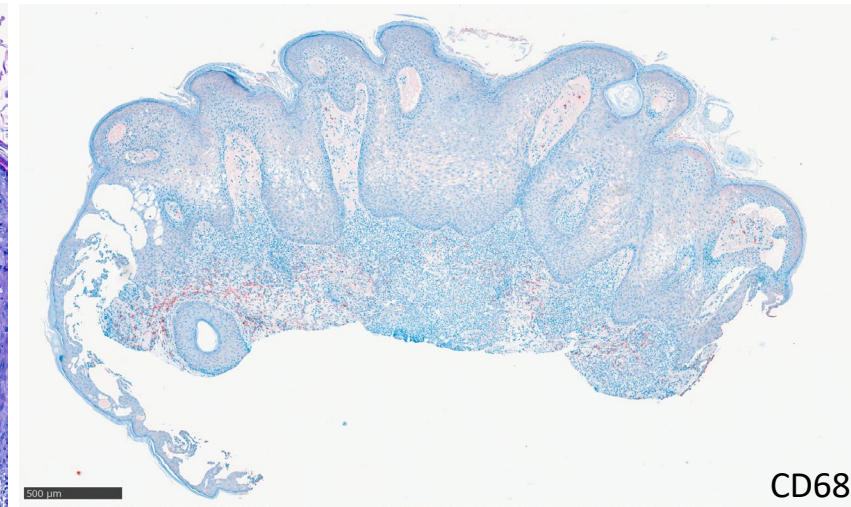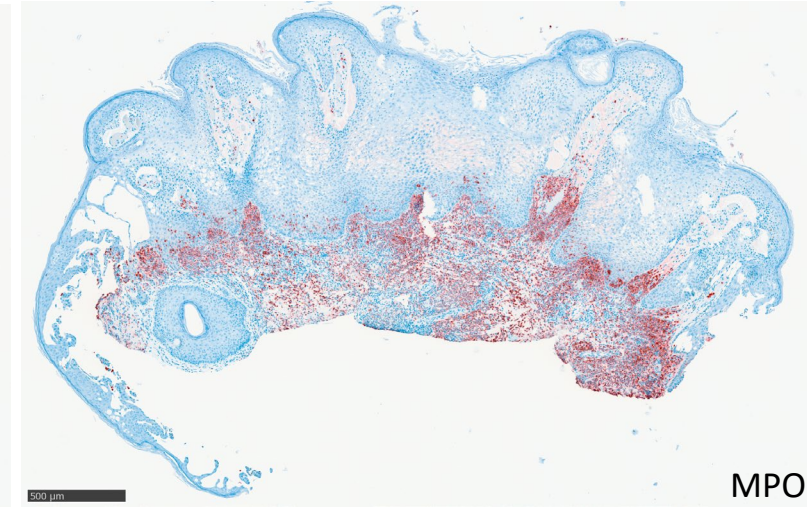

**Figure S2: Histology of patient 7 after 8 hours.** The HE stains showed fibrinoid thrombi in small vessels (yellow star). Immunohistochemically the inflammatory infiltrate was mixed with dominance of neutrophils.



Patient 3

t0

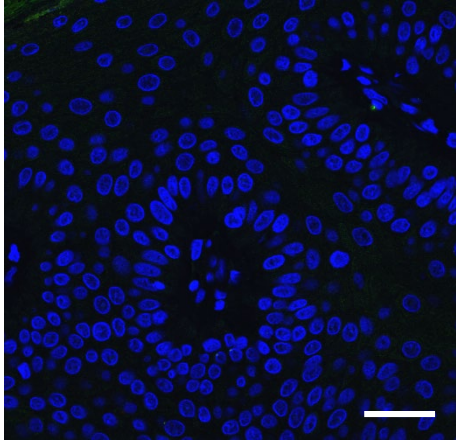

t3

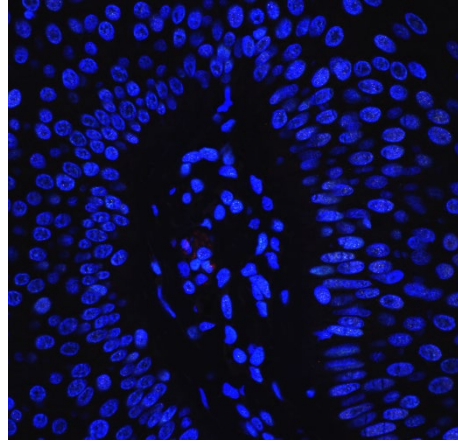

t8

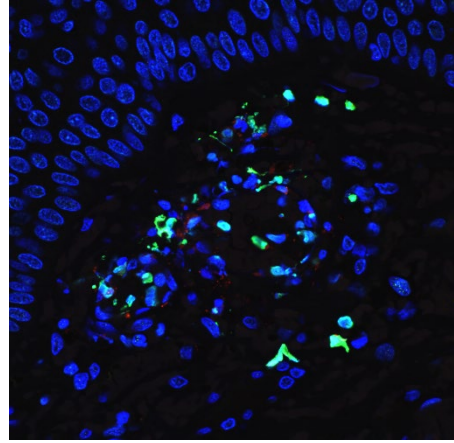

Isotyp (t8)

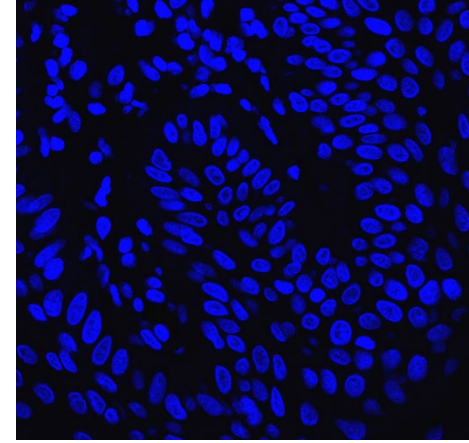

Patient 6

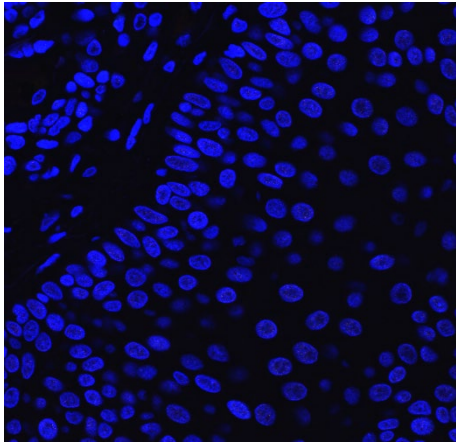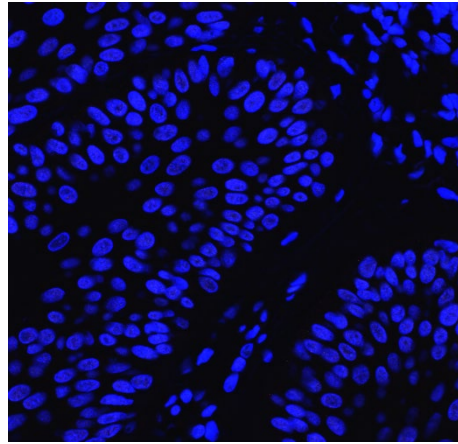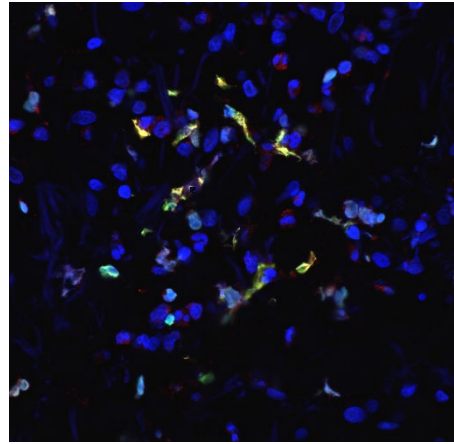

Patient 7

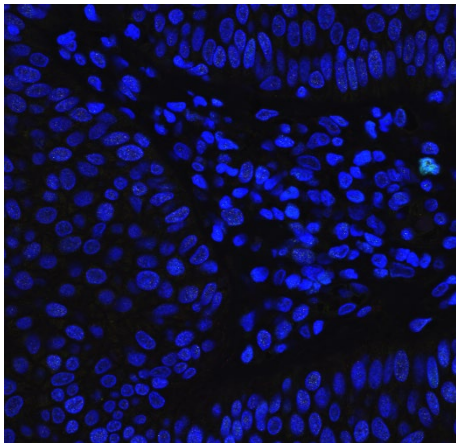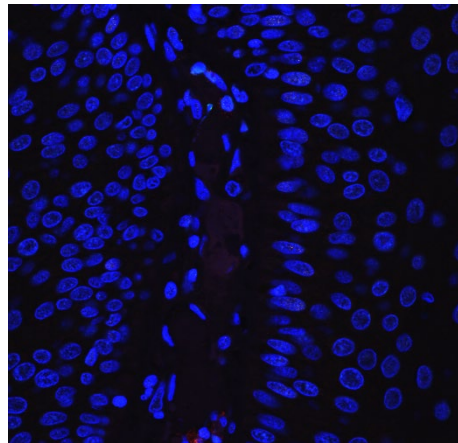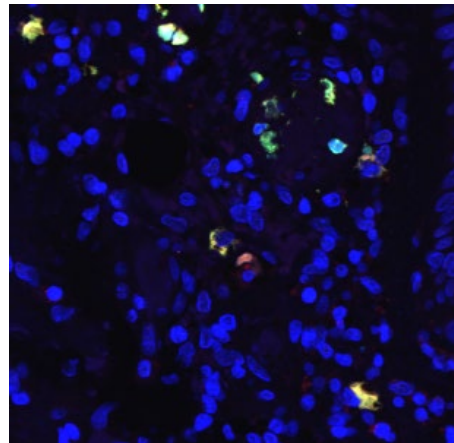

**Figure S3: Ingenol mebutate mediates Neutrophil extracellular trap (NET)-formation.** Tissue sections were stained for H3cit (green) as a marker of NET-formation and MPO (red) as a marker for neutrophils at the indicated time-points. Chromatin was stained with Hoechst (blue). After 8 hours (t8), neutrophil infiltration and NET-formation was visible. (scale bar 25  $\mu$ m)
